# Supplementary material for: Inhibition of Candida parapsilosis Fatty Acid Synthase (Fas2) Induces Mitochondrial Cell Death in Serum
Source: PubMed Central journal article supplement (PMC3431346; doi:10.1371/journal.ppat.1002879), 2012-08-30
Supplement: ppat.1002879.s002.pdf [file ppat.1002879.s002.pdf]

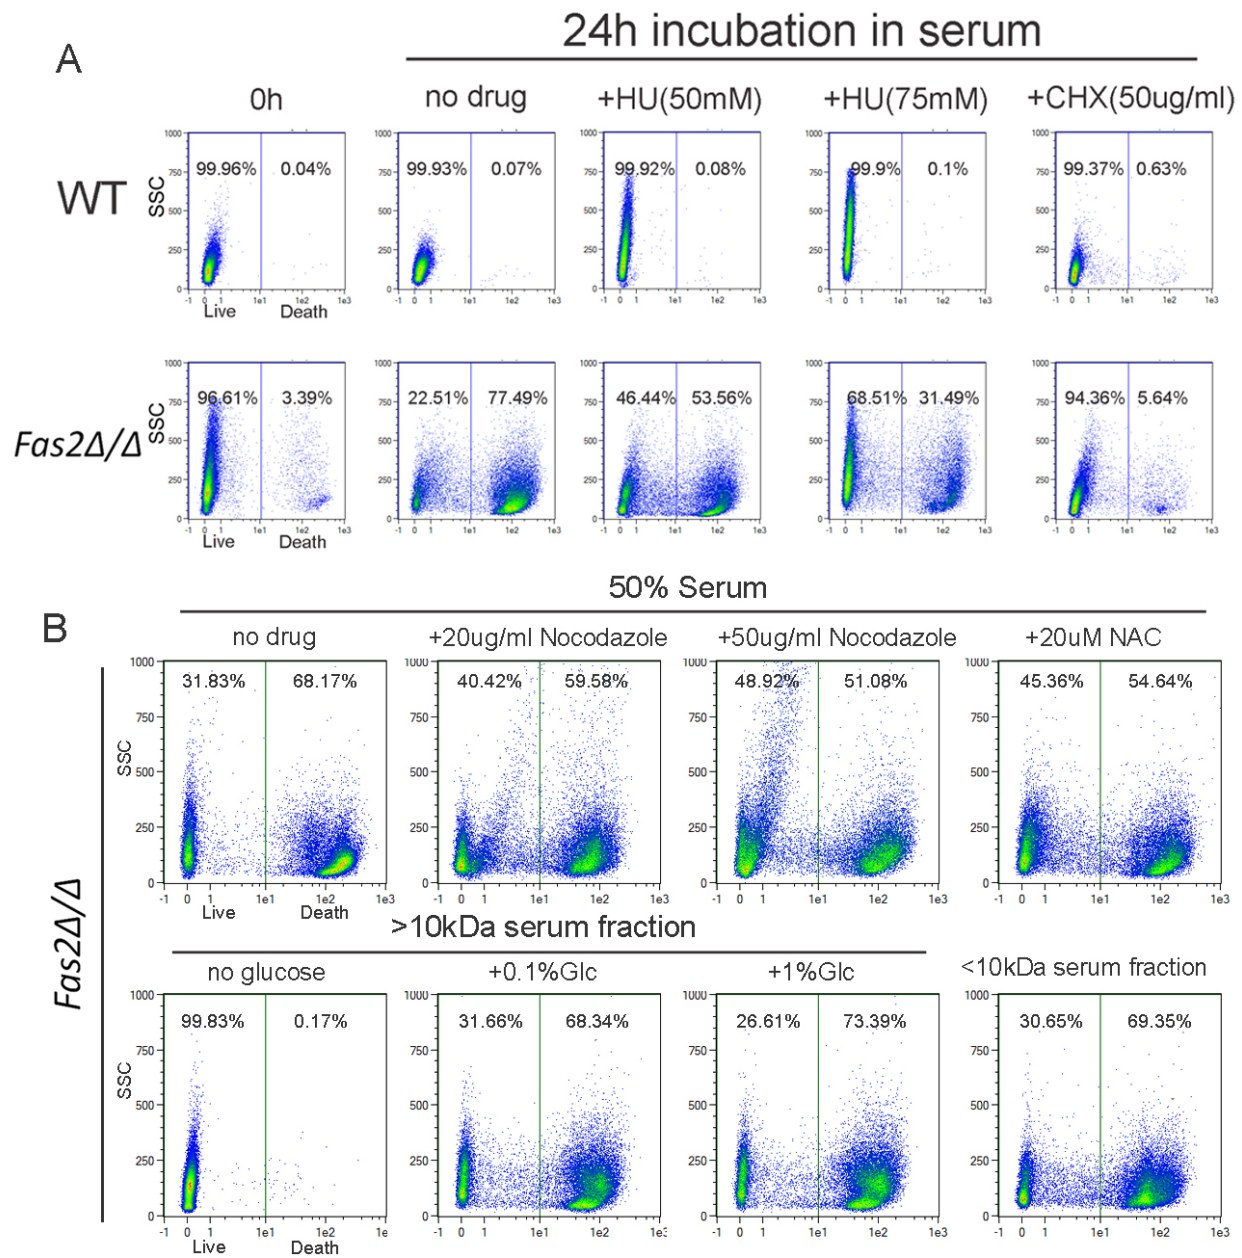

**Figure S2.**
